# Supplementary material
Source: PubMed Central journal article supplement (PMC3088990)
Supplement: NIHMS283868-supplement-supplemental_table.pdf [file NIHMS283868-supplement-supplemental_table.pdf]

**Table 1. Panel A: Sequences of ZnT8 siRNA. Panel B: primers used for real-time-PCR**

**A**

|                               |                        |
|-------------------------------|------------------------|
| ZnT8 siRNA sense sequence     | CCGUCAUGAUCUJAAAAGAUU  |
| ZnT8 siRNA antisense sequence | UCUUUUUAGAUC AUGACGGUU |

**B**

| Gene of interest | Sense real-time PCR primer | Antisense real-time PCR primer |
|------------------|----------------------------|--------------------------------|
| Beta Actin       | ACCAACTGGGACGATATGGAGAAGA  | TACGACCAGAGGCATACAGGGACAA      |
| ZnT1             | AGTCCATGAGCTACATGTCTGGCA   | TCACACGGGAGCACACTTGACTTA       |
| ZnT2             | CAGAAGGATTCTGGAAGTCACC     | CGGGAAGACACCCAGAGG             |
| ZnT3             | GTCTCCCTCTGGATAGTCACTGG    | GCATACTCTGCACCTGTAGATCC        |
| ZnT4             | AGTTGCTGAAGCAGAGGAAGGTGA   | TTTGAGGACAGCCACAAAGCAAGC       |
| ZnT5             | TCATGGCAAAGATGGCTGAACACC   | ACATAAAGCCAGCACCAGCAAGAG       |
| ZnT6             | TTCTGTTGCGTGCAATCAACGTGC   | GGCAGTTAATGCGATGCTGTTGGT       |
| ZnT7             | ATCTGTTGCGCAAGATCTCAGGCT   | AAGCGAAAGAGAGGTT CAGGCACA      |
| ZnT8             | AAGTGGAGACTCTGTGCTGCTTCA   | GGCCTCGATGACAACCACAAAGAA       |
| ZnT9             | TATGTGGTTCCCGACATTCACCCA   | TGGAGCTTTGAGTTCTGCGCCTAT       |
| ZnT10            | TCTGAAGCACTCAATATCAGAGG    | AGAATATGATAGCCGTGATGACC        |
| ZIP1             | CAGTGGAGACCTATTTGCTCTTTTA  | CTACTTTTCTCTCACTCCAGACCAG      |
| ZIP2             | CATATGACTGCTGAAGCTCTGG     | CGAGAAGAATTTCCCTTACTTCC        |
| ZIP3             | TGGCGTATTCCTGGCTACATGCTT   | ACACAGTGAGGAAGAAACCCACCA       |
| ZIP4             | ACTGGACGGCCTGTAAATACGCT    | TGTGGCTTGTCAGGTTTGCCTAGA       |
| ZIP5             | AGGACCTAGTGAGCAATCAGAGG    | TTCTCCAAGATCCCTTTTGTTC         |
| ZIP6             | TGAGTCTGTGAGTGAGCCCAGAAA   | TTGCATTCAACAGAGCCTGGATGC       |
| ZIP7             | AGGGATCCTGACCACAATGACAGT   | AATTGCAGTCACGAGTTGCAGACG       |
| ZIP8             | TAACCAGGTGCAACTTCTGTGCCA   | AAATCAATCCCAGGAGAGAGGCCA       |
| ZIP9             | CTGTGGCAATGTTGGTGGGATGTT   | AGTGCAGTTCCACAGAGAAGACCA       |
| ZIP10            | ACCTTTGCCCTGCATTGCTGTATC   | ACACCCAGCAAGGAAAGCAGACTA       |
| ZIP11            | ACAGTATCCAGCATGCTCCAAGGT   | AAAGCCCAGGCTTCCGTCTAAGAT       |
| ZIP12            | CATCTCATACCTCAGGTTCTTGG    | ATTAATAATGGCAGACCCTTG          |
| ZIP13            | AACCTGCTTGCCAACACCATAGAC   | ATGGTGGTCAGAAGCCCAGTCTTT       |
| ZIP14            | AATGTTTCCAGCCCAAGGAAGGA    | TCTGAGATCGCTCGCTCAAGTTGT       |
